# Supplementary material
Source: HighWire-hosted journal article supplement (https://bmjopenquality.bmj.com/content/8/3/e000436)
Supplement: inline-supplementary-material-1 [file inline-supplementary-material-1.pdf]

Kingdom of Saudi Arabia  
Ministry of National Guard Health Affairs



ASSESSMENT FOR FOLLOW UP  
PATIENT- LUNG CANCER

Date : \_\_\_\_\_ Time \_\_\_\_\_

HISTORY OF PRESENT ILLNESS: (Disease type/ stage/ previous management)  
\_\_\_\_\_  
\_\_\_\_\_

Is the patient Enrolled in a study NO ☐ YES ☐ specify the (RC) Number \_\_\_\_\_

Current cancer therapy \_\_\_\_\_

ROS / Side effect (grading as mentioned in CTCAE version 4)

| Adverse Event Name | Grading 1 to 4 | Onset Date | Relation          | Intervention |
|--------------------|----------------|------------|-------------------|--------------|
|                    |                |            | Yes / No/ Unknown |              |
|                    |                |            |                   |              |
|                    |                |            |                   |              |
|                    |                |            |                   |              |

Investigation :

- Performance Status: ☐ 0 ☐ 1 ☐ 2 ☐ 3 ☐ 4
- Physical examination  
\_\_\_\_\_  
\_\_\_\_\_
- Laboratory :  
\_\_\_\_\_  
\_\_\_\_\_
- Radiology :  
\_\_\_\_\_  
\_\_\_\_\_

RECIST criteria ☐ PR ☐ SD ☐ PD ☐ CR Other, specify \_\_\_\_\_

Assessment  
\_\_\_\_\_  
\_\_\_\_\_  
\_\_\_\_\_  
\_\_\_\_\_  
\_\_\_\_\_  
\_\_\_\_\_  
\_\_\_\_\_  
\_\_\_\_\_

Plan (Cancer management):

- ☐ Continue on same regimen \_\_\_\_\_ cycle# \_\_\_\_\_ interval: \_\_\_\_\_
- ☐ Modify current cancer therapy to: \_\_\_\_\_  
Reason: \_\_\_\_\_
- ☐ Change treatment to regimen \_\_\_\_\_ cycle# \_\_\_\_\_ interval: \_\_\_\_\_  
Reason: \_\_\_\_\_
- ☐ Is the treatment according to guideline? Yes ☐ No ☐ Justify \_\_\_\_\_
- ☐ Discussions in Tumor board specify reason, \_\_\_\_\_

Other Issue:

- ☐ Any other recommendations/plans:  
\_\_\_\_\_  
\_\_\_\_\_  
\_\_\_\_\_  
\_\_\_\_\_  
\_\_\_\_\_

Follow up appointment :

- ☐ Clinic Appointment \_\_\_\_\_
- ☐ Chemotherapy appointment \_\_\_\_\_
- ☐ Requested Labs : \_\_\_\_\_
- ☐ Requested Imaging \_\_\_\_\_

Follow up with other disciplinary:

- ☐ Clinical Pharmacist
- ☐ Social Worker
- ☐ Nurse Clinic

Physician Name \_\_\_\_\_ Badge \_\_\_\_\_ Signature \_\_\_\_\_ Date \_\_\_\_\_
