# Supplementary material
Source: HighWire-hosted journal article supplement (https://bmjopenquality.bmj.com/content/8/3/e000436)
Supplement: inline-supplementary-material-2 [file inline-supplementary-material-2.pdf]

Kingdom of Saudi Arabia  
Ministry of National Guard Health



**ASSESSMENT FOR NEW PATIENT  
LUNG CANCER**

Date : \_\_\_\_\_ Time \_\_\_\_\_

**PERSONAL HISTORY:**  
Age \_\_\_\_\_ Gender \_\_\_\_\_

**HISTORY OF PRESENT ILLNESS:**  
\_\_\_\_\_  
\_\_\_\_\_  
\_\_\_\_\_

| SYMPTOMS            | DATE OF ONSET | DESCRIPTION                              |
|---------------------|---------------|------------------------------------------|
| Cough               |               |                                          |
| Shortness of Breath |               |                                          |
| Hemoptysis          |               |                                          |
| Weight Loss         |               | Baseline weight :<br>Amount loss :       |
| Headache            |               |                                          |
| Pain                |               | Pain Score :      Location:<br>Duration: |
| Others :            |               |                                          |

**SOCIAL HISTORY:** Marital Status: \_\_\_\_\_ Residence: \_\_\_\_\_ Occupation: \_\_\_\_\_ Nationality: \_\_\_\_\_  
**FAMILY HISTORY:** ☐ None  
**PAST MEDICAL HISTORY:** ☐ None

| Past Medical Disease | Date of Onset | Management including Treatment | Status |
|----------------------|---------------|--------------------------------|--------|
|                      |               |                                |        |
|                      |               |                                |        |
|                      |               |                                |        |

**PAST SURGICAL HISTORY:** ☐ None

| Procedure Name | Reason for the Procedure | Procedure Date |
|----------------|--------------------------|----------------|
|                |                          |                |
|                |                          |                |
|                |                          |                |

**MEDICATION HISTORY:** ☐ None

| Current Medications | Start Date/ Year |
|---------------------|------------------|
|                     |                  |
|                     |                  |
|                     |                  |

**COMPLEMENTARY and ALTERNATIVE MEDICINE (CAM):**  
☐ Zamzam Water   ☐ Camel Milk   ☐ Camel Urine   ☐ Honey   ☐ Black Seed   ☐ Others \_\_\_\_\_

**SMOKING HISTORY AND RISK FACTORS:**

☐ None Smoker:      ☐ Former Smoker      Date of Quitting \_\_\_\_\_

**CURRENT SMOKER:**  
 No. of packs/day : \_\_\_\_\_ No of years \_\_\_\_\_ Type of Smoking: ☐ cigarettes   ☐ bubbly smoking   ☐ nuff  
☐ Others, specify \_\_\_\_\_

**EXPOSURE TO RISK FACTORS:** ☐ Radiation   ☐ Incense (Bachour)   ☐ Passive Smoking  
☐ Others, specify \_\_\_\_\_

**PHYSICAL EXAMINATION:**  
 Performance Status: ☐ 0   ☐ 1   ☐ 2   ☐ 3   ☐ 4  
 Weight \_\_\_\_\_ Height \_\_\_\_\_

**Vital Signs :** Temp. \_\_\_\_\_ Pulse \_\_\_\_\_ Respiration \_\_\_\_\_ Oxygen Saturation \_\_\_\_\_

**PERTINENT FINDINGS:**  
☐ Chest Exam, specify \_\_\_\_\_   ☐ Lymph Nodes   ☐ Clubbing   ☐ Others \_\_\_\_\_

**INVESTIGATIONS:** Labs: \_\_\_\_\_  
 Radiology: \_\_\_\_\_  
 Pathology : ☐ Adenocarcinoma   ☐ Squamous Cell Carcinoma   ☐ Large Cell Carcinoma  
☐ Small Cell Carcinoma   ☐ Other, specify \_\_\_\_\_

**TUMOR MARKERS:** 1-EGFR ☐ MUTANT   ☐ WILD TYPE   ☐ NOTE DONE, reason \_\_\_\_\_  
 2- ALK ☐ POSITIVE   ☐ NEGATIVE   ☐ NOT DONE, reason \_\_\_\_\_

**Assessment Disease (Type/ Stage)** T ( )      N ( )      M ( )

☐ Counseled about smoking cessation

**PLAN OF MANAGEMENT:**  
 regimen \_\_\_\_\_ cycle# \_\_\_\_\_ interval: \_\_\_\_\_

**FOLLOW UP APPOINTMENT:** ☐ Chemotherapy Appointment \_\_\_\_\_  
☐ Clinic (MD) Appointment \_\_\_\_\_

**APPOINTMENT WITH OTHER DISCIPLINES:**  
☐ Social Worker \_\_\_\_\_  
☐ Clinical Pharmacist \_\_\_\_\_  
☐ Nurse Clinic \_\_\_\_\_  
☐ Other \_\_\_\_\_

☐ Discussion in Tumor Board, reason \_\_\_\_\_ ☐ Yes ☐ No      Justify \_\_\_\_\_

☐ Requested Labs \_\_\_\_\_ ☐ Requested Imaging \_\_\_\_\_

**Is the treatment according to Clinical Practice Guidelines:** ☐ Yes   ☐ No Justify \_\_\_\_\_

**Will the patient be enrolled in a study:** ☐ No   ☐ Yes      Specify the (RC) Number \_\_\_\_\_

**PHYSICIAN'S NAME** \_\_\_\_\_ **BN** \_\_\_\_\_ **SIGNATURE** \_\_\_\_\_ **DATE** \_\_\_\_\_
